# Supplementary material for: Outstanding Phenotypic Differences in the Profile of Amyloid-β between Tg2576 and APPswe/PS1dE9 Transgenic Mouse Models of Alzheimer’s Disease
Source: PubMed Central journal article supplement — J Alzheimers Dis. 2016 Aug 3;53(3):773–85. doi: 10.3233/JAD-160280 (PMC4981901; doi:10.3233/jad-160280), 2016-08-03
Supplement: jad-53-jad160280-s001.pdf [file jad-53-jad160280-s001.pdf]

## Supplementary Material

Supplementary Figure 1: a) Full length A $\beta$  species (APP/PS1).

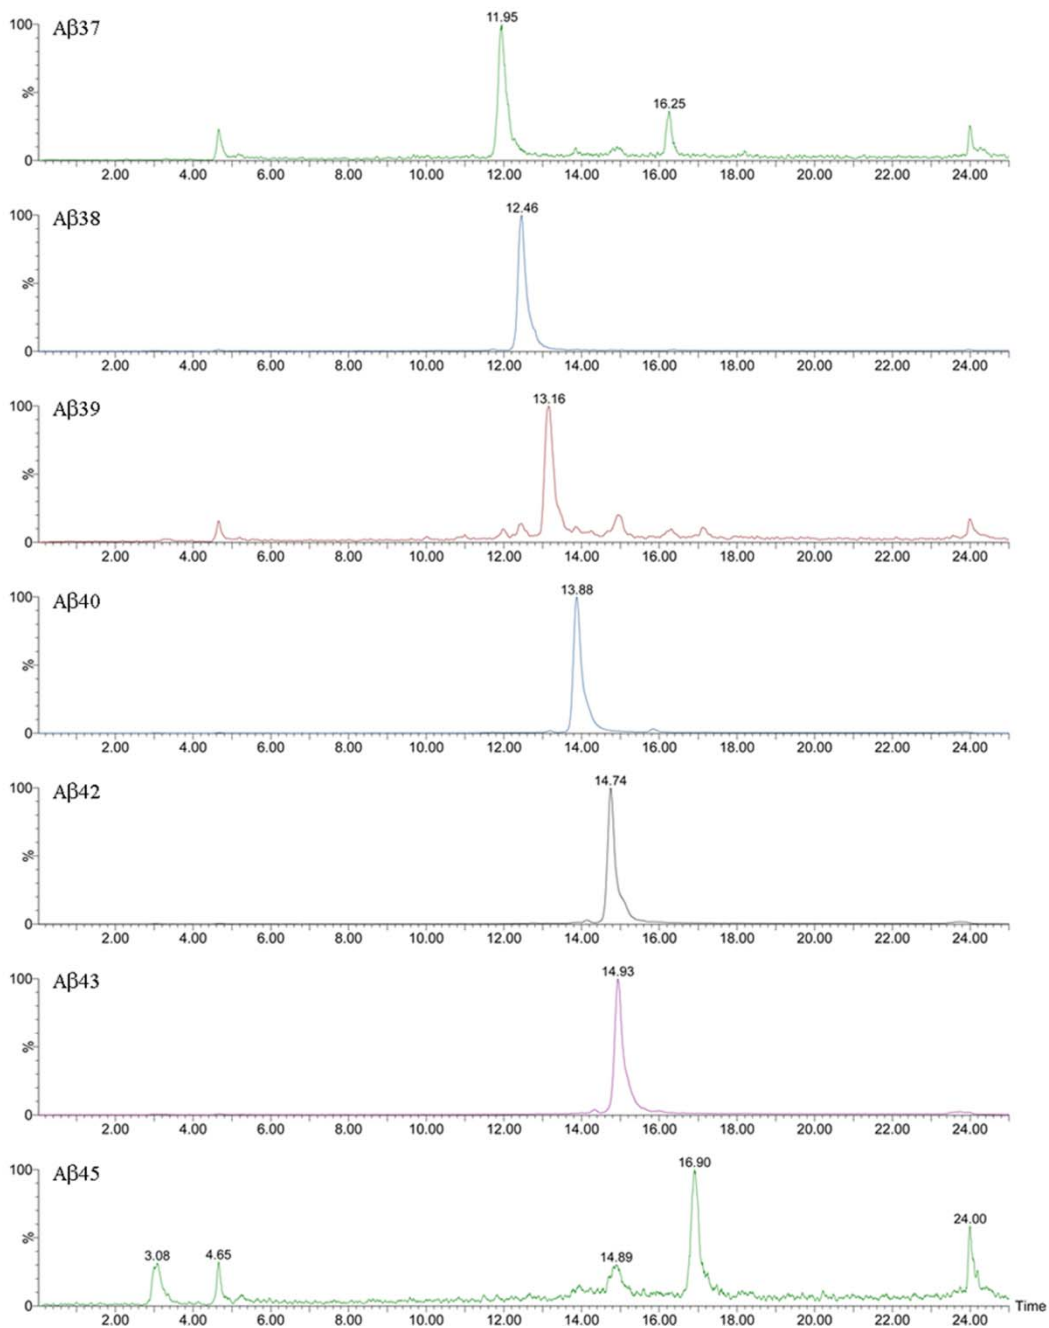

b) Full length minor A $\beta$  species (APP/PS1).

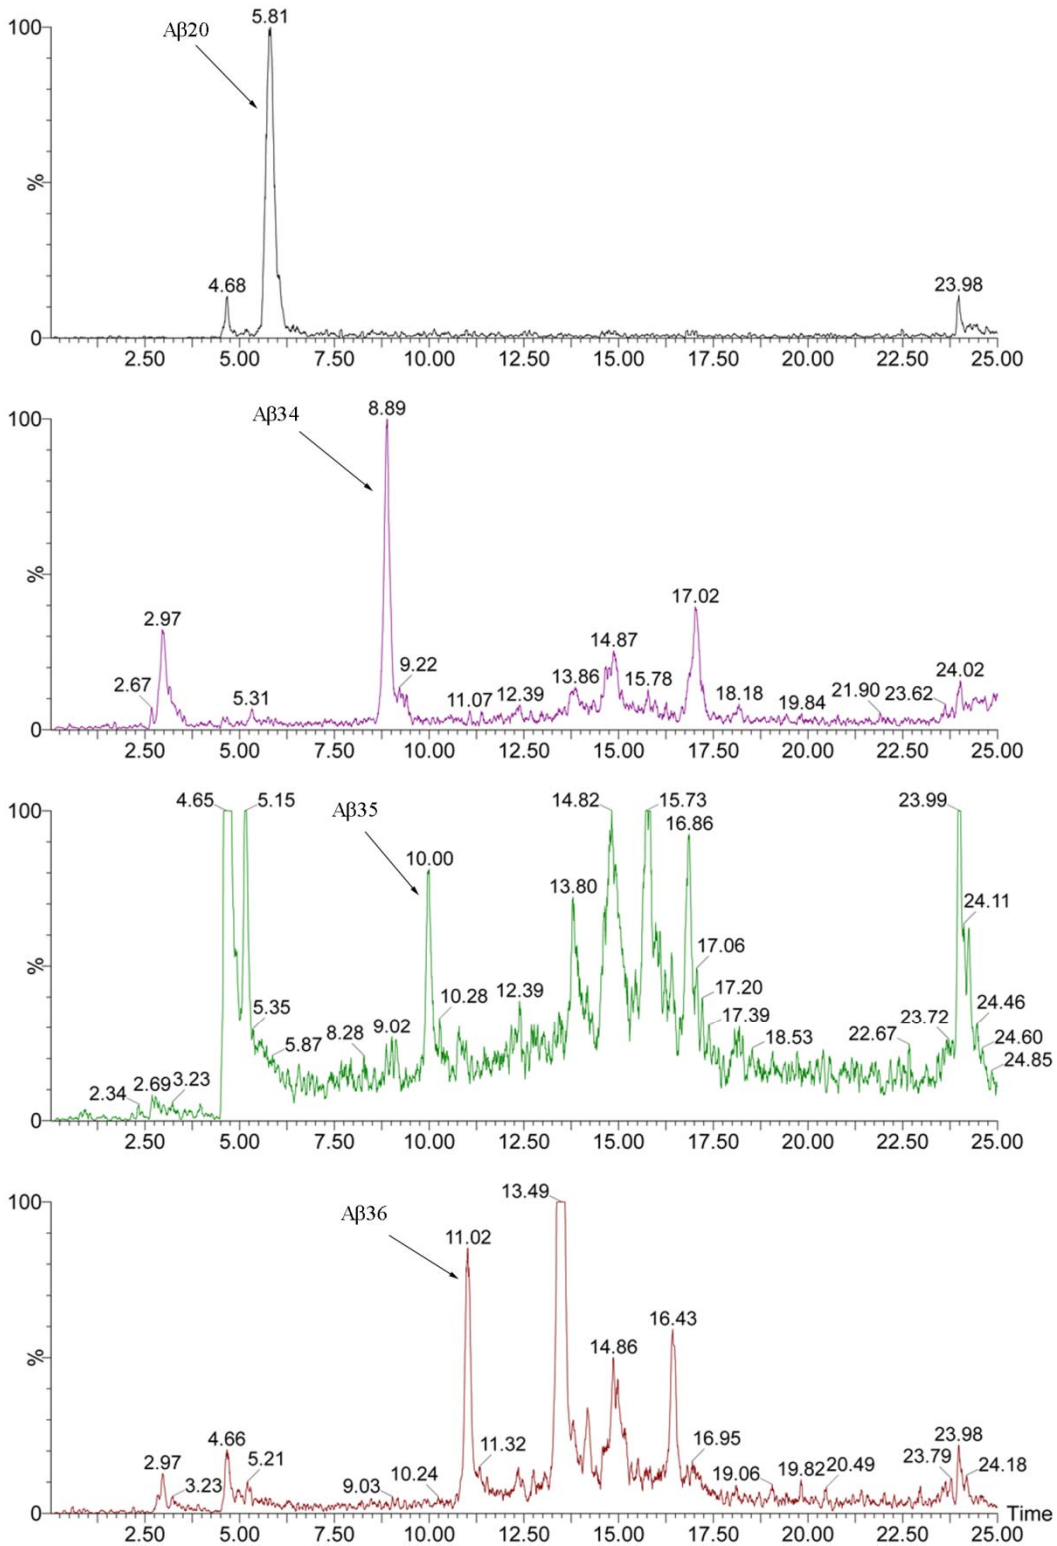

c) Oxidized A $\beta$  species (APP/PS1). Peaks at the right hand side of the oxidized species correspond to in-source oxidation of the unmodified peptide.

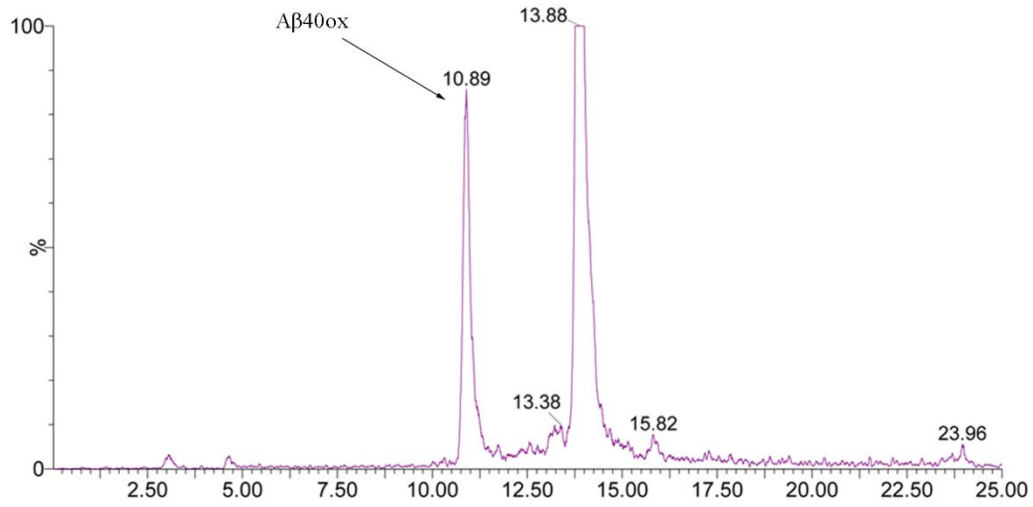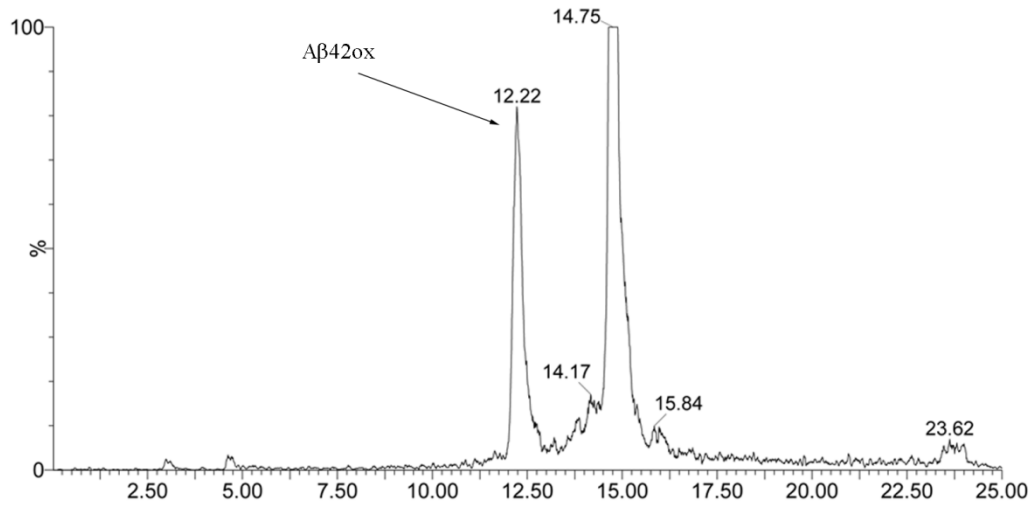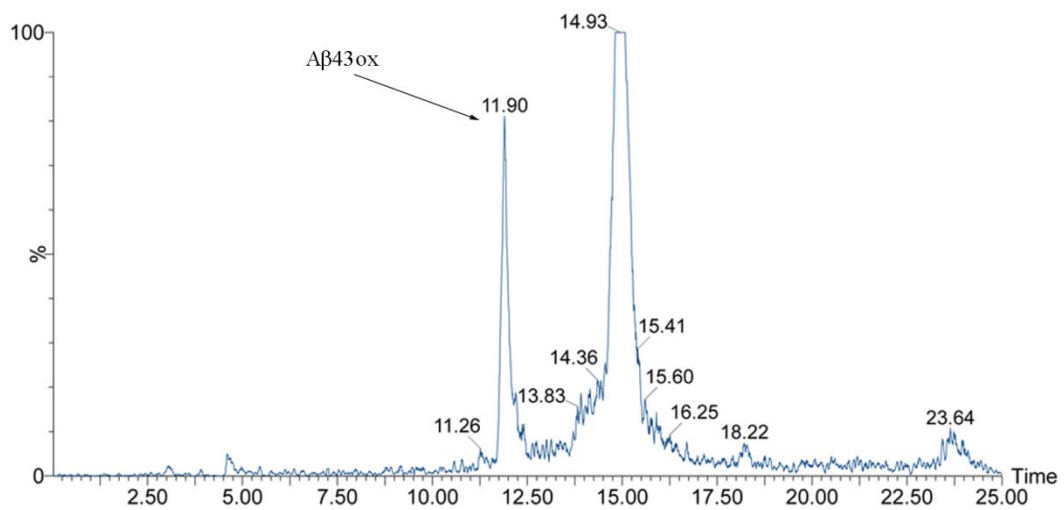

d1 and d2) Truncated A $\beta$  species (APP/PS1).

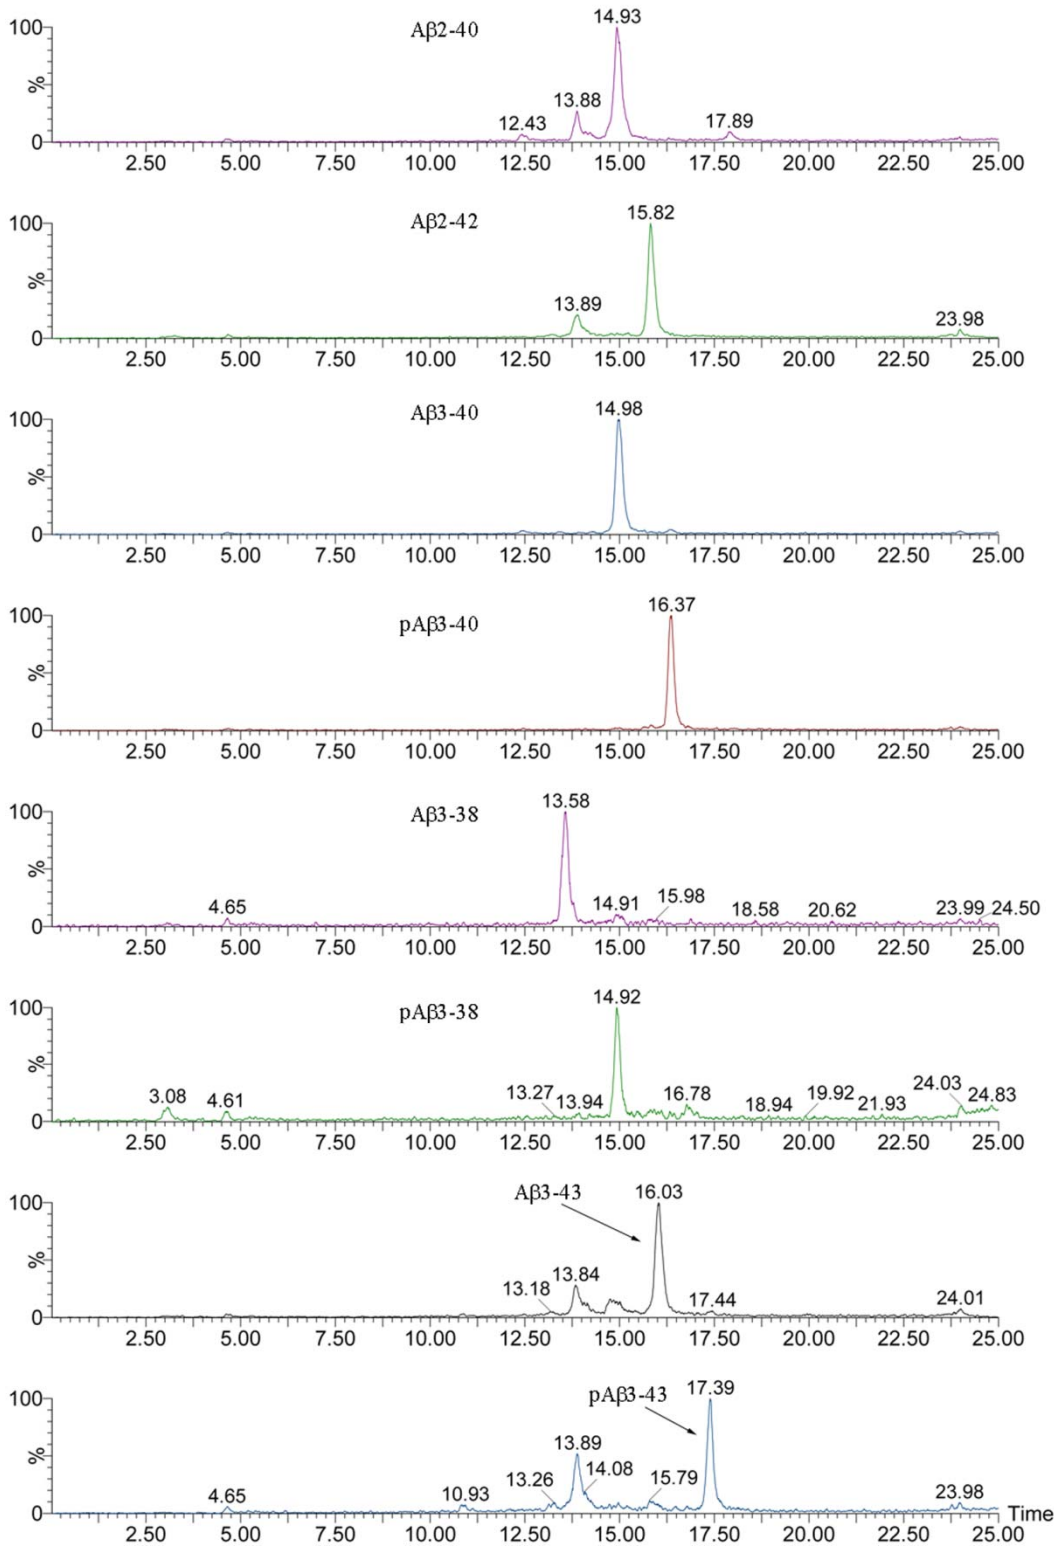

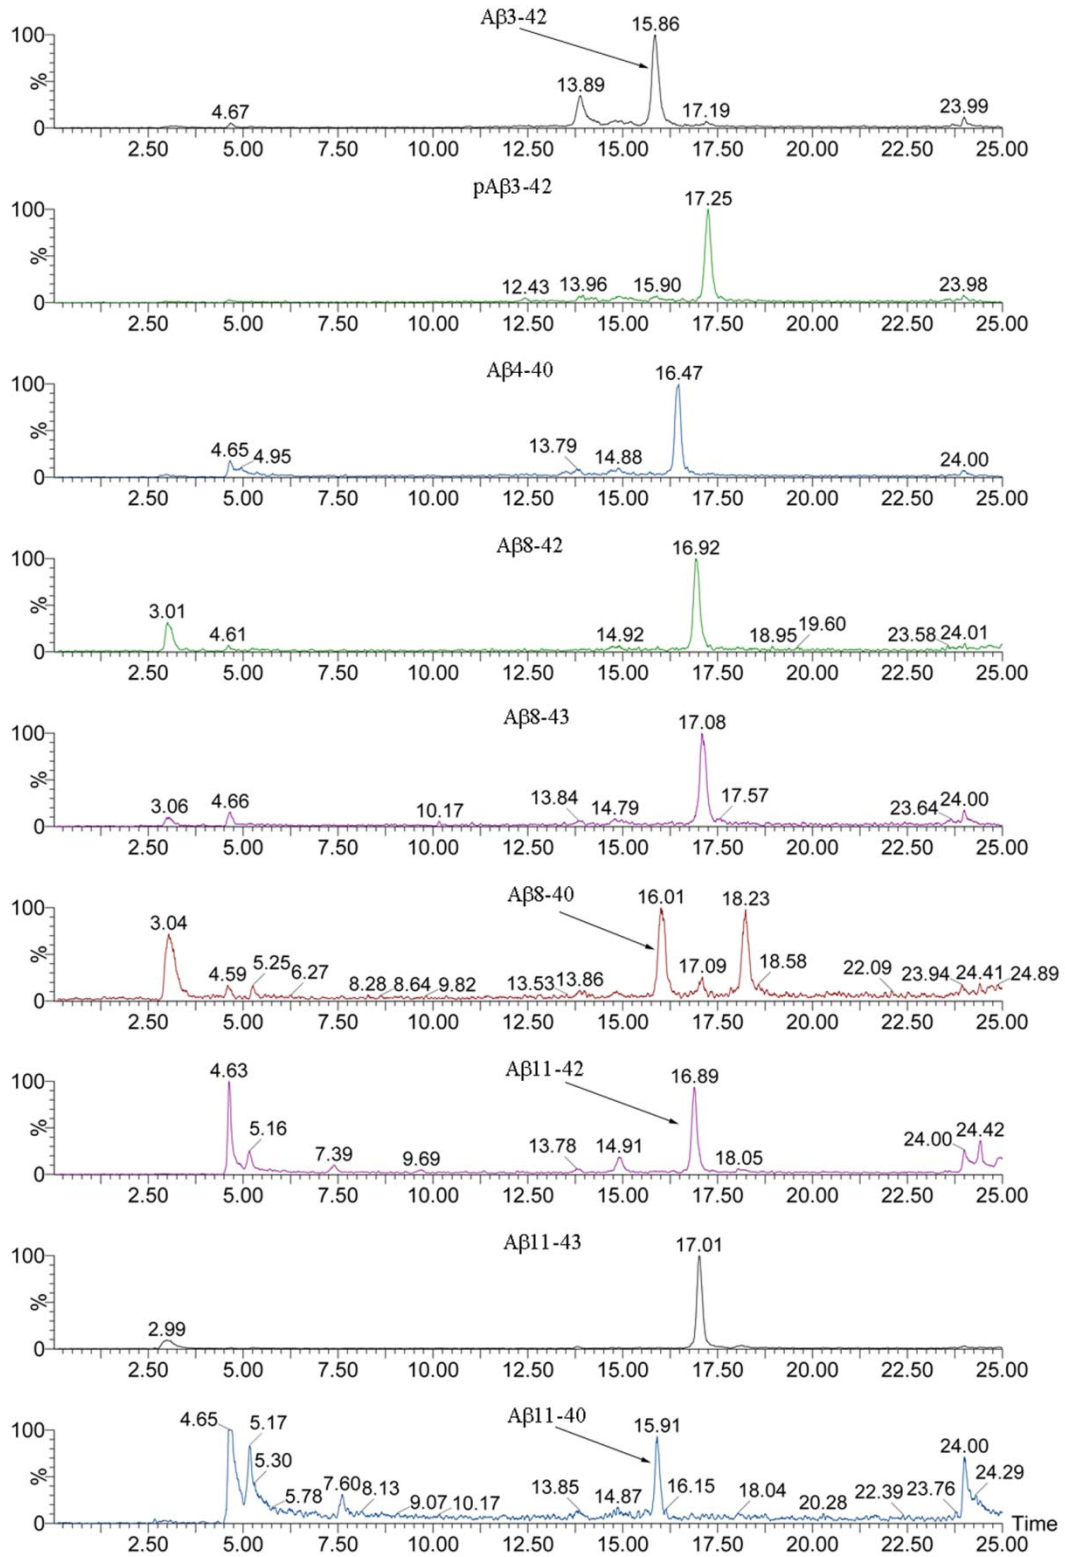

e) Murine A $\beta$  species (APP/PS1).

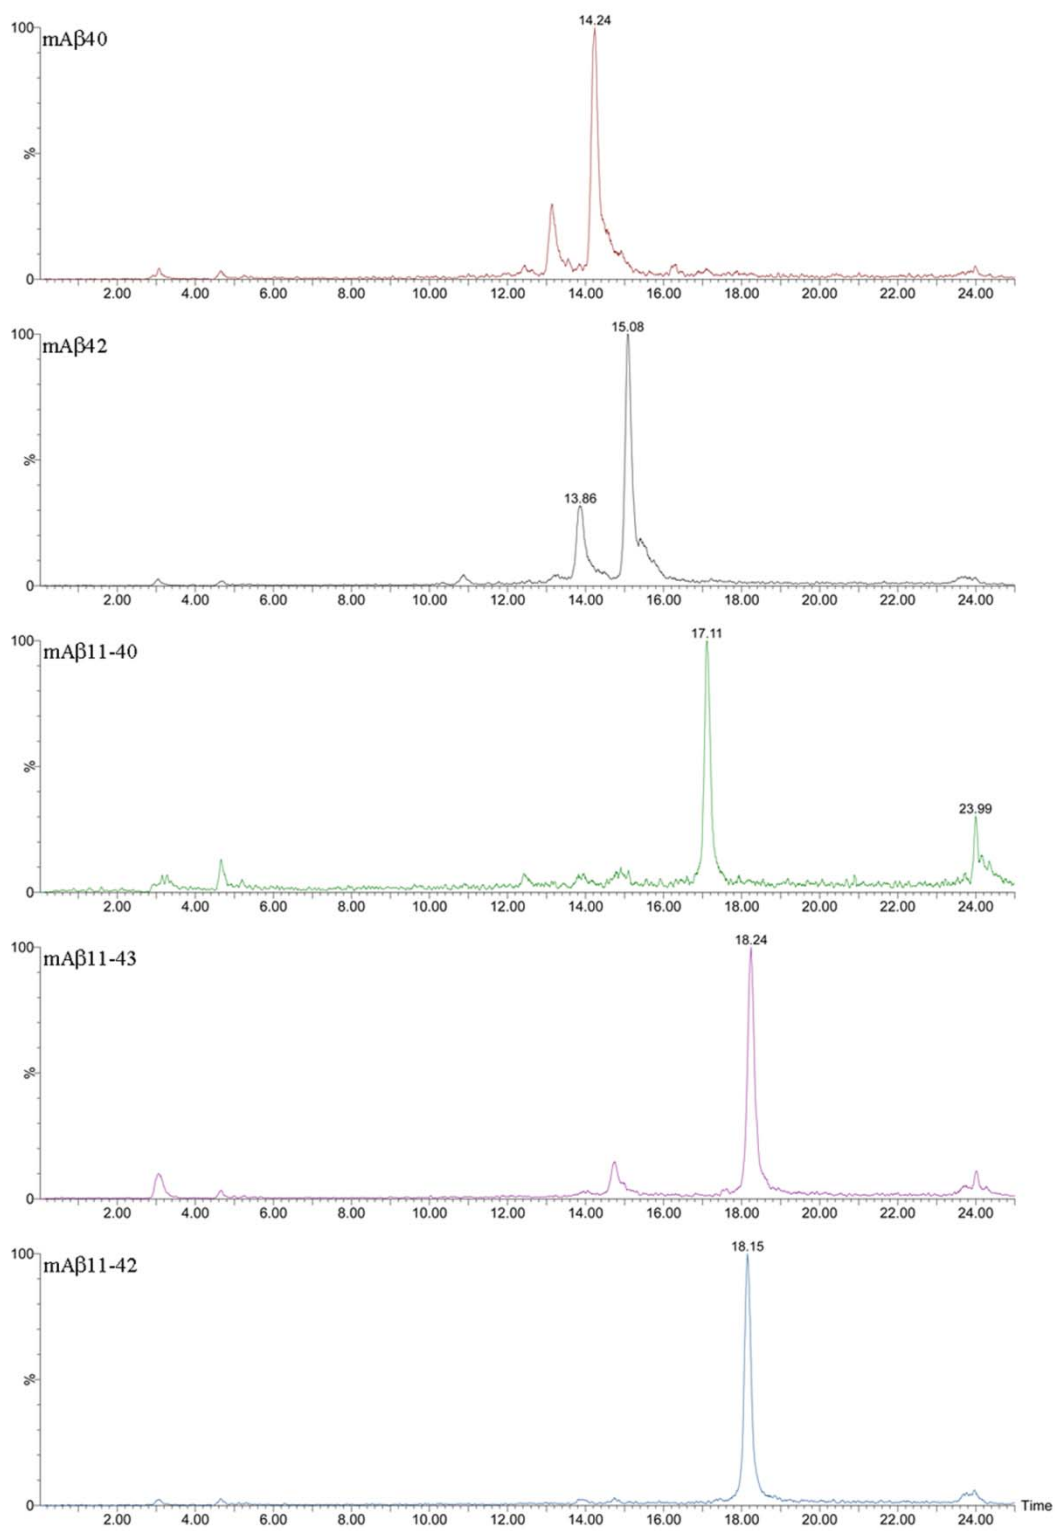

f) Murine pyr-Glu A $\beta$  species (APP/PS1). Peaks at the left hand side of the pyr-modified mouse species correspond to the unmodified human counterparts.

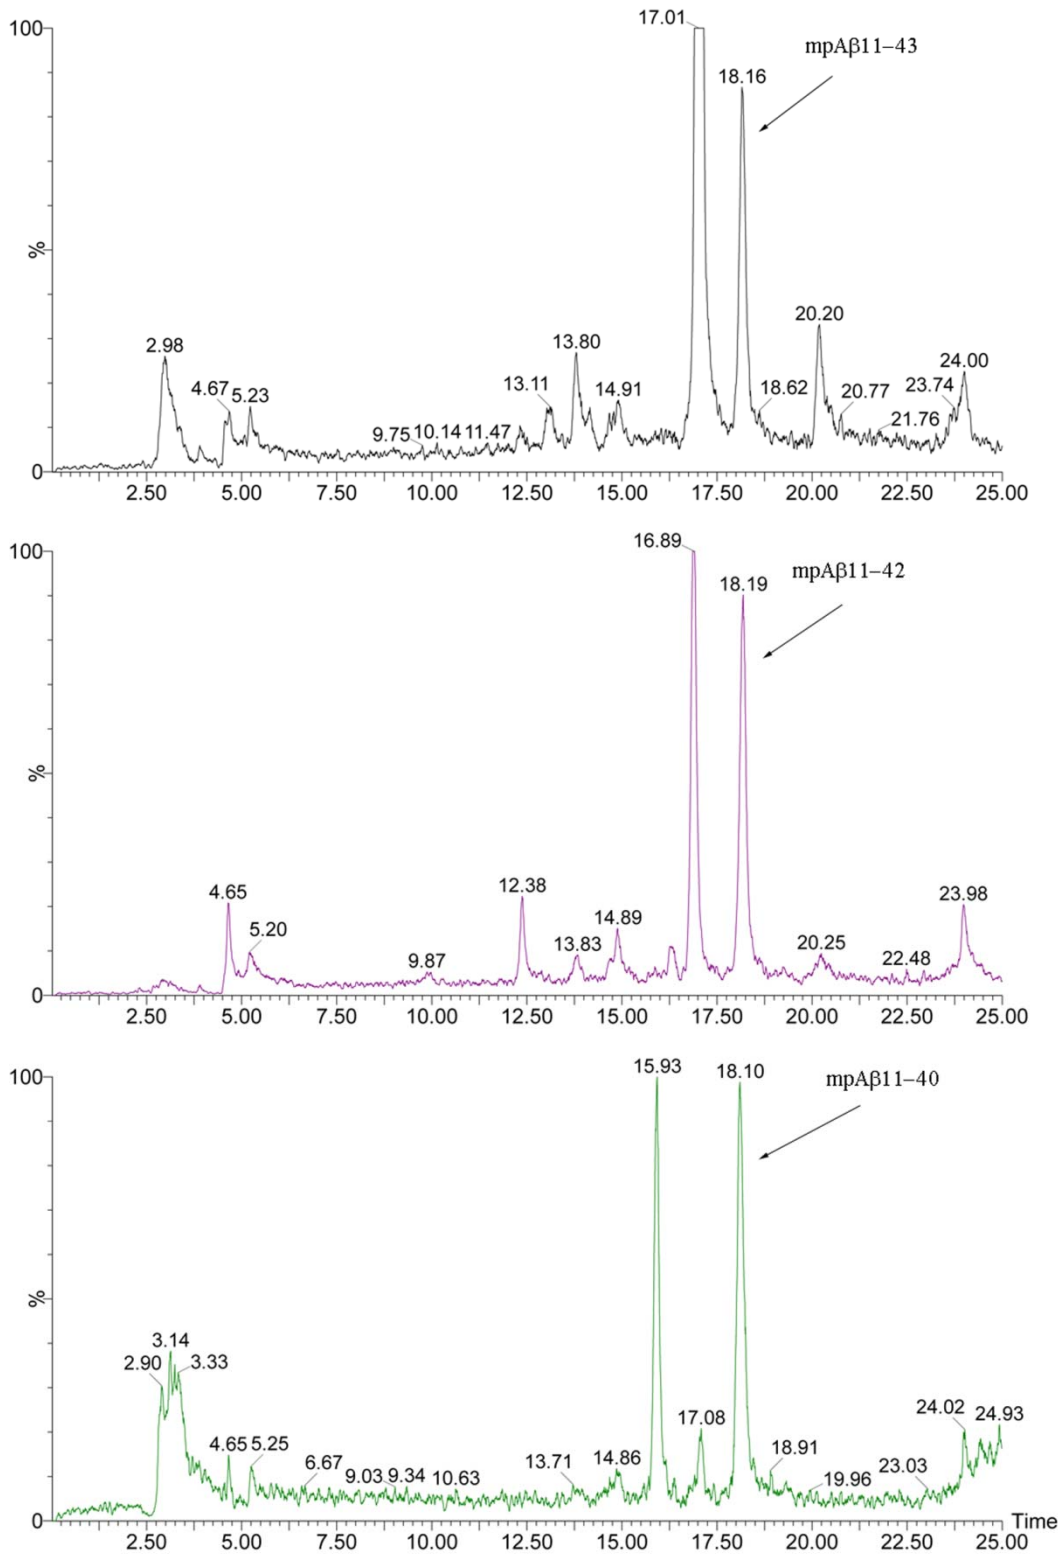

**Supplementary Figure 2:** Mass spectrum of a brain extract from Tg 2576 mice (aged 18 months) after IP with mAb 4G8. The peak labeled with an asterisk at  $m/z = 2991$  was also present in the blank samples (data not shown). Peak labeled with + corresponds to a known co-eluting peptide.

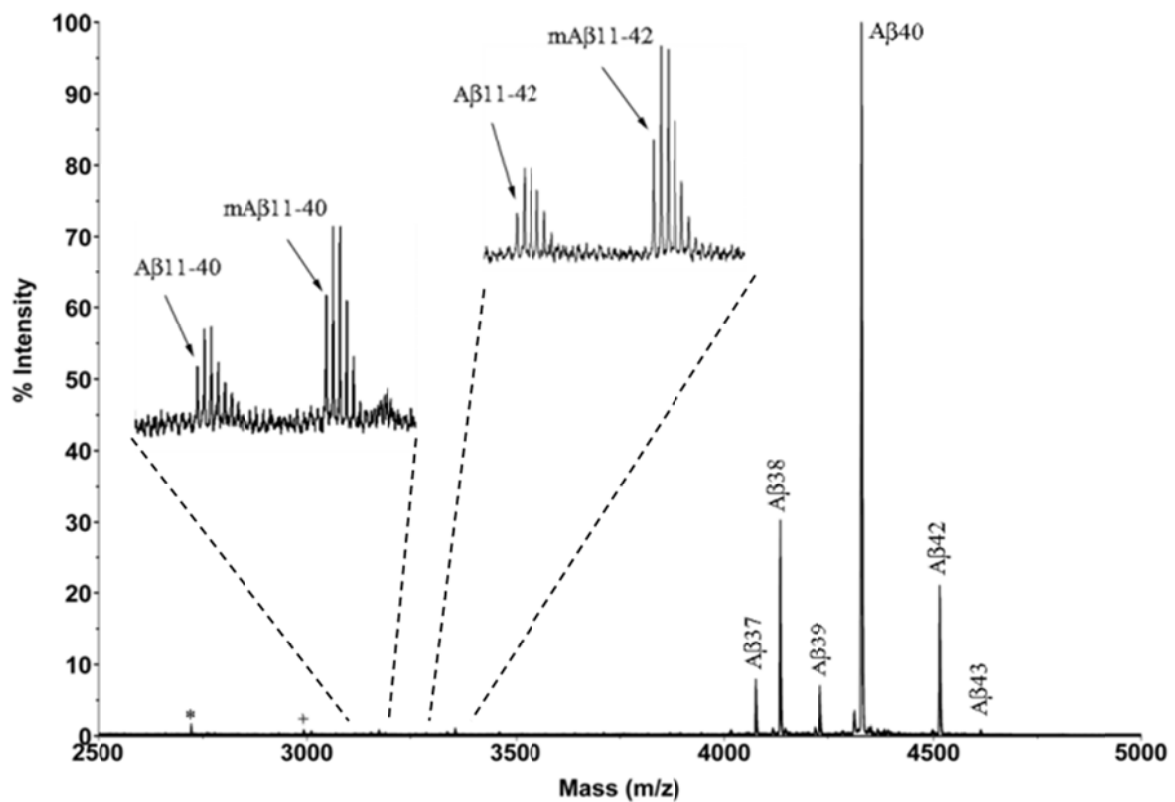



**Supplementary Figure 3:** Mass spectrum of a brain extract from APP/PS1 mice (aged 18 months) after IP with mAb 1F3. The peak labeled with an asterisk at  $m/z = 2991$  was also present in the blank samples. Peak labeled with + corresponds to known co-eluting peptide.

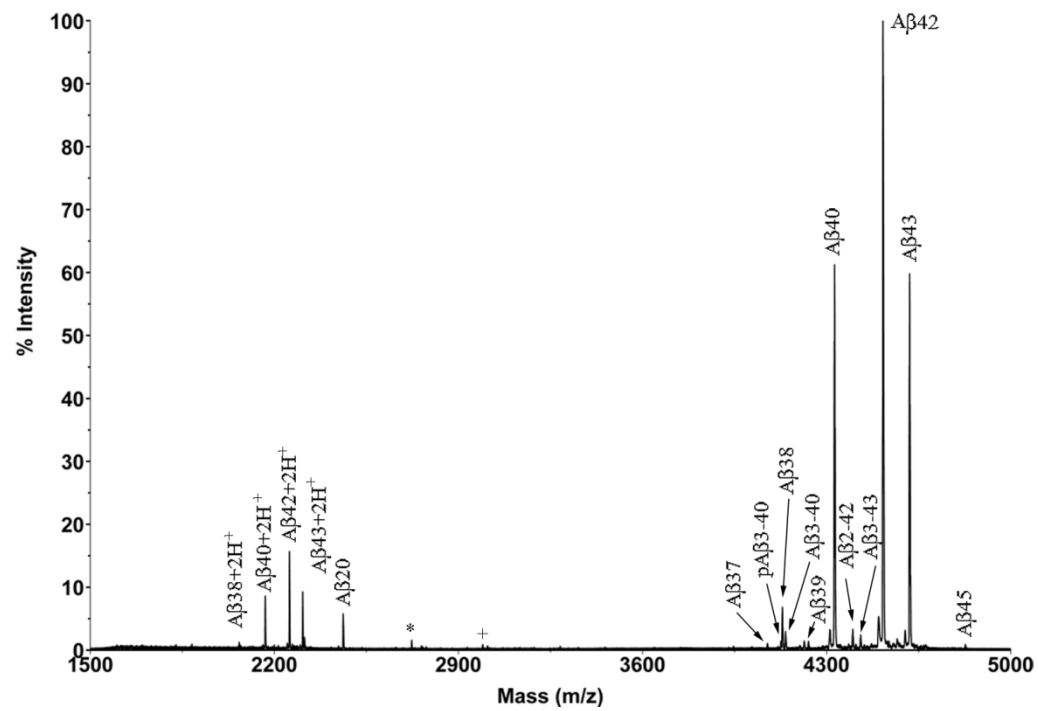

**Supplementary Figure 4:** Mass spectrum of human brain extract (entorhinal cortex) from an Alzheimer's disease patient after immunoprecipitation of the insoluble fraction with mAb 4G8.

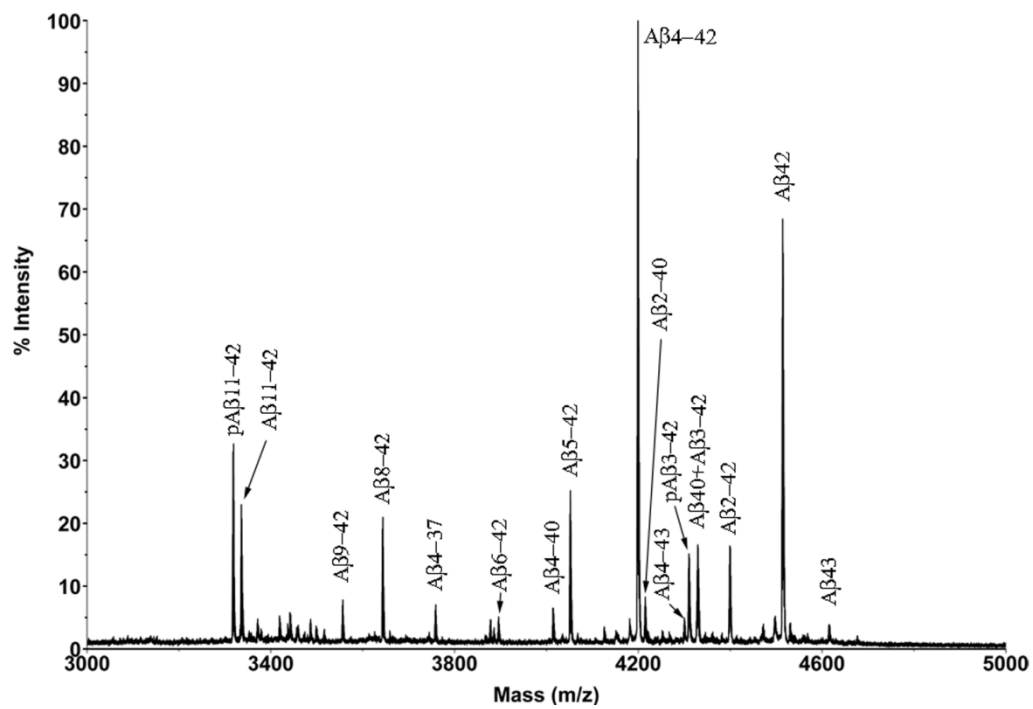

**Supplementary Figure 5:** mRNA expression levels for BACE-1, murine A $\beta$ PP (mA $\beta$ PP) and human A $\beta$ PP (hA $\beta$ PP) in the brain of Tg2576 and APP/PS1 transgenic (Tg) and wild type (WT) mice. Data are expressed as mean  $\pm$  standard deviation.

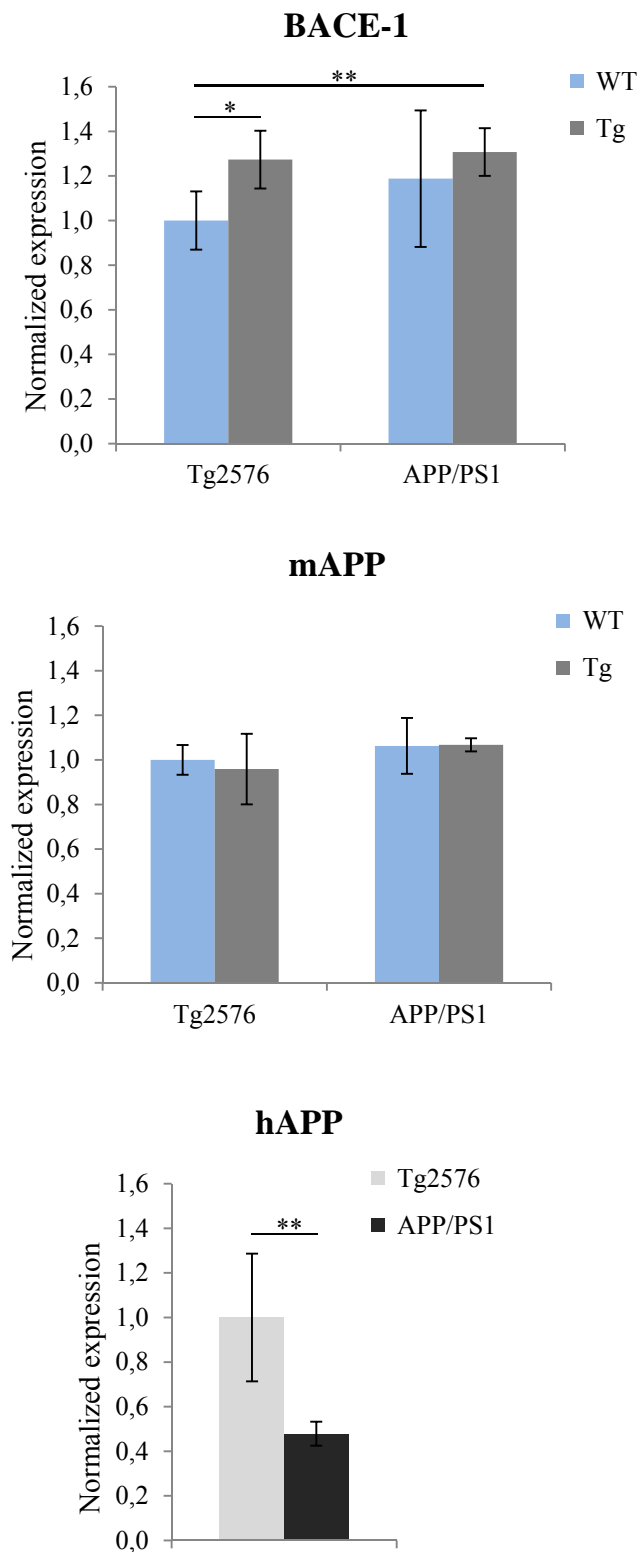

**Supplementary Table 1:** Human A $\beta$ <sub>40</sub> and A $\beta$ <sub>42</sub> concentrations (mean and % coefficient of variation [CV]) obtained by ELISA sandwich in plasma and insoluble brain fractions of transgenic mice.

|                 |      | <b>APPswe/PS1dE9</b>                    |                                         |                                         |                                         |
|-----------------|------|-----------------------------------------|-----------------------------------------|-----------------------------------------|-----------------------------------------|
|                 |      | <b>Plasma</b>                           | <b>Plasma</b>                           | <b>Insoluble</b>                        | <b>Insoluble</b>                        |
|                 |      | <b>A<math>\beta</math><sub>40</sub></b> | <b>A<math>\beta</math><sub>42</sub></b> | <b>A<math>\beta</math><sub>40</sub></b> | <b>A<math>\beta</math><sub>42</sub></b> |
|                 |      | <b>(pg/mL)</b>                          | <b>(pg/mL)</b>                          | <b>(ng/mL</b>                           | <b>(ng/mL</b>                           |
|                 |      |                                         |                                         | <b>extract)</b>                         | <b>extract)</b>                         |
| <b>Tg 3m</b> ♂  | Mean | 754,5                                   | 301,0                                   | 18,3                                    | 5,4                                     |
|                 | % CV | 37,5                                    | 20,7                                    | 45,2                                    | 26,7                                    |
| <b>Tg 3m</b> ♀  | Mean | 902,6                                   | 309,6                                   | 15,1                                    | 11,5                                    |
|                 | % CV | 27,8                                    | 16,1                                    | 23,2                                    | 27,3                                    |
| <b>Tg 6m</b> ♂  | Mean | 921,9                                   | 267,9                                   | 105,1                                   | 217,5                                   |
|                 | % CV | 32,7                                    | 37,8                                    | 61,3                                    | 26,9                                    |
| <b>Tg 6m</b> ♀  | Mean | 880,0                                   | 294,9                                   | 206,4                                   | 263,1                                   |
|                 | % CV | 49,6                                    | 35,8                                    | 25,4                                    | 4,0                                     |
| <b>Tg 12m</b> ♂ | Mean | 1234,9                                  | 314,1                                   | 741,2                                   | 708,1                                   |
|                 | % CV | 25,1                                    | 36,2                                    | 13,4                                    | 3,3                                     |
| <b>Tg 12m</b> ♀ | Mean | 426,8                                   | 199,3                                   | 1026,4                                  | 794,2                                   |
|                 | % CV | 120,5                                   | 66,2                                    | 10,1                                    | 4,3                                     |
| <b>Tg 18m</b> ♂ | Mean | 1020,8                                  | 299,7                                   | 1209,0                                  | 814,3                                   |
|                 | % CV | 16,9                                    | 18,5                                    | 3,4                                     | 6,5                                     |
| <b>Tg 18m</b> ♀ | Mean | 1044,8                                  | 310,7                                   | 1229,8                                  | 841,8                                   |
|                 | % CV | 53,5                                    | 42,8                                    | 6,0                                     | 4,6                                     |

|                 |      | <b>Tg2576</b>                           |                                         |                                         |                                         |
|-----------------|------|-----------------------------------------|-----------------------------------------|-----------------------------------------|-----------------------------------------|
|                 |      | <b>Plasma</b>                           | <b>Plasma</b>                           | <b>Insoluble</b>                        | <b>Insoluble</b>                        |
|                 |      | <b>A<math>\beta</math><sub>40</sub></b> | <b>A<math>\beta</math><sub>42</sub></b> | <b>A<math>\beta</math><sub>40</sub></b> | <b>A<math>\beta</math><sub>42</sub></b> |
|                 |      | <b>(pg/mL)</b>                          | <b>(pg/mL)</b>                          | <b>(ng/mL</b>                           | <b>(ng/mL</b>                           |
|                 |      |                                         |                                         | <b>extract)</b>                         | <b>extract)</b>                         |
| <b>Tg 3m</b> ♂  | Mean | 2343,9                                  | 537,5                                   | 14,9                                    | 4,6                                     |
|                 | % CV | 55,6                                    | 63                                      | 6,4                                     | 20,0                                    |
| <b>Tg 3m</b> ♀  | Mean | 2533,3                                  | 598,2                                   | 8,9                                     | 4,4                                     |
|                 | % CV | 10,4                                    | 16,6                                    | 15,2                                    | 29,2                                    |
| <b>Tg 6m</b> ♂  | Mean | 2643,5                                  | 558,8                                   | n.d.                                    | 5,2                                     |
|                 | % CV | 20,1                                    | 38,7                                    | -                                       | 51,2                                    |
| <b>Tg 6m</b> ♀  | Mean | 1498,8                                  | 206,1                                   | n.d.                                    | n.d.                                    |
|                 | % CV | 33,1                                    | 71                                      | -                                       | -                                       |
| <b>Tg 12m</b> ♂ | Mean | 2378,9                                  | 406,1                                   | 76,0                                    | 29,9                                    |
|                 | % CV | 35,4                                    | 51,2                                    | 38,4                                    | 15,9                                    |
| <b>Tg 12m</b> ♀ | Mean | 1328,5                                  | 180,0                                   | 177,1                                   | 47,6                                    |
|                 | % CV | 32,2                                    | 28,9                                    | 92,5                                    | 68,3                                    |
| <b>Tg 18m</b> ♂ | Mean | 953,2                                   | 108,6                                   | 1006,0                                  | 364,7                                   |
|                 | % CV | 43,4                                    | 78,5                                    | 17,8                                    | 14,4                                    |
| <b>Tg 18m</b> ♀ | Mean | 829,3                                   | 88,0                                    | 951,4                                   | 327,5                                   |
|                 | % CV | 79,4                                    | 58,4                                    | 12,2                                    | 18,5                                    |
